# Supplementary material for: Intrinsic FGF2 and FGF5 promotes angiogenesis of human aortic endothelial cells in 3D microfluidic angiogenesis system
Source: Sci Rep. 2016 Jun 30;6:28832. doi: 10.1038/srep28832 (PMC4928073; doi:10.1038/srep28832)
Supplement: Supplementary Information [file srep28832-s1.pdf]

## Supplementary Information

### **Intrinsic FGF2 and FGF5 promotes angiogenesis of human aortic endothelial cells in 3D microfluidic angiogenesis system**

Ha-Rim Seo<sup>1,\*</sup>, Hyo Eun Jeong<sup>2,\*</sup>, Hyung Joon Joo<sup>1</sup>, Seung-Cheol Choi<sup>1</sup>, Chi-Yeon Park<sup>1</sup>, Jong-Ho Kim<sup>1</sup>, Ji-Hyun Choi<sup>1</sup>, Long-Hui Cui<sup>1</sup>, Soon Jun Hong<sup>1</sup>, Seok Chung<sup>2,†</sup> & Do-Sun Lim<sup>1,†</sup>

<sup>1</sup>Department of Cardiology, Cardiovascular Center, College of Medicine, Korea University, 126-1, 5-ga, Anam-dong, Seongbuk-gu, Seoul 136-705, Republic of Korea.

<sup>2</sup>Department of Mechanical Engineering, #512B, Innovation Hall, Korea University, 5-ga, Anam-dong, Seongbuk-gu, Seoul 136-701, Republic of Korea.

\* These authors equally contributed to this work

† These authors equally supervised this work

Address correspondence to:

\* Do-Sun Lim

Department of Cardiology, Cardiovascular Center, College of Medicine, Korea University, 126-1, 5-ga, Anam-dong, Seongbuk-gu, Seoul 136-705, Republic of Korea

Phone: +82-2-920-5445; Fax: +82-2-927-1478; E-mail: [dslmd@kumc.or.kr](mailto:dslmd@kumc.or.kr)

\* Seok Chung

Department of Mechanical Engineering, #512B, Innovation Hall, Korea University, 5-ga, Anam-dong, Seongbuk-gu, Seoul 136-701, Republic of Korea

Phone: +82-2-3290-3352; Fax: +82-2-926-9290; E-mail: [sidchung@korea.ac.kr](mailto:sidchung@korea.ac.kr)

## Supplementary Figure 1

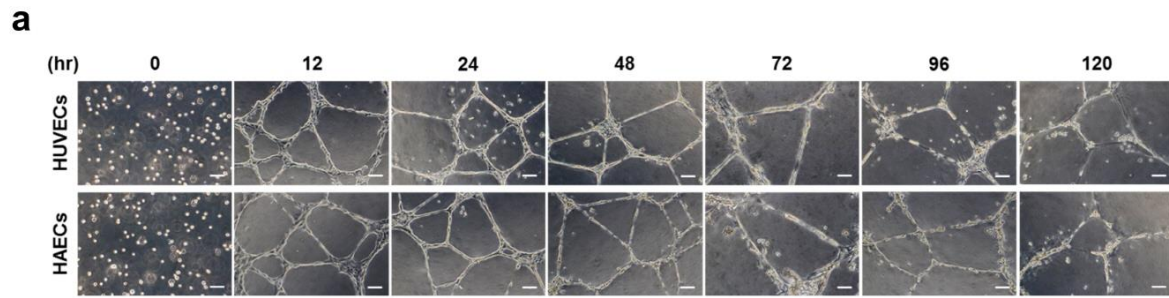

**Supplementary Figure 1.** *In vitro* Matrigel tube forming assay up to 120 hrs. **(a)** Phase contrast images obtained during network formation assay from 0–120 hrs between HUVECs and HAECs. Scale bar = 100  $\mu$ m.

## Supplementary Figure 2

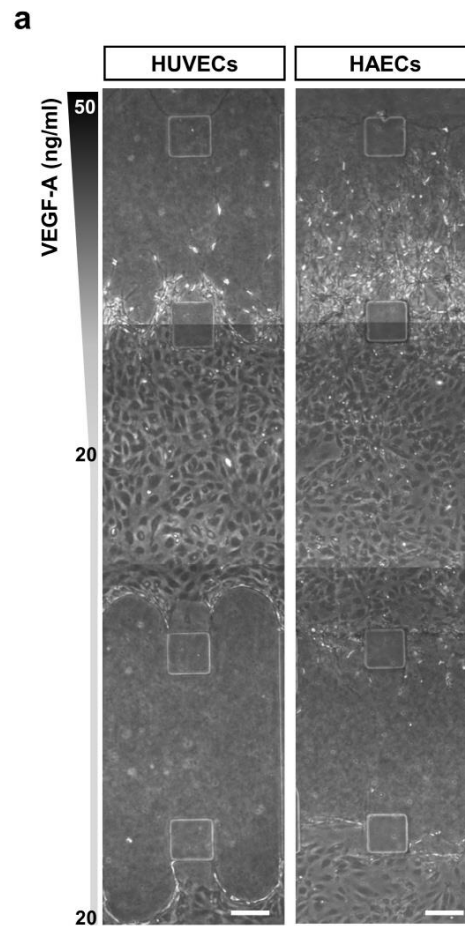

**Supplementary Figure 2.** Different sprouting patterns of HUVECs and HAECs in the 3D microfluidic angiogenesis system. **(a)** Phage contrast images of whole 3D microfluidic angiogenesis system channels under VEGF-A stimulation. Phase contrast image of the 3D microfluidic device culture stimulated with a VEGF-A gradient of HUVECs and HAECs. Scale bar = 150  $\mu$ m.

### Supplementary Figure 3

**a**

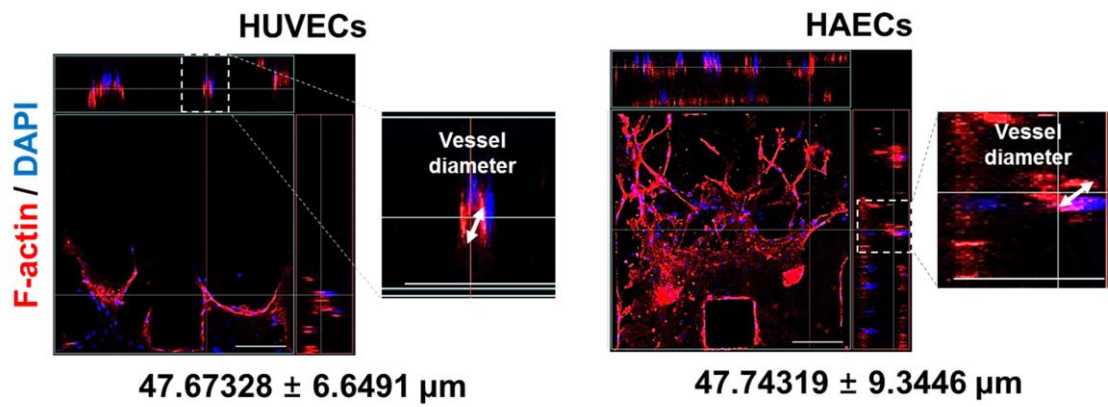

**b**

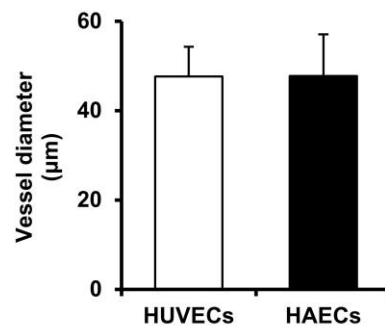

**Supplementary Figure 3.** Measurement of vessel diameter in HUVECs and HAECs. **(a)** Immunofluorescence staining with F-actin (red) and orthographic projection derived from a z-stack of HUVECs and HAECs. Nucleus were stained by DAPI (blue). Scale bar = 150  $\mu\text{m}$ . **(b)** Quantification of vessel diameter between HUVECs and HAECs.  $n = 10$ .

## Supplementary Figure 4

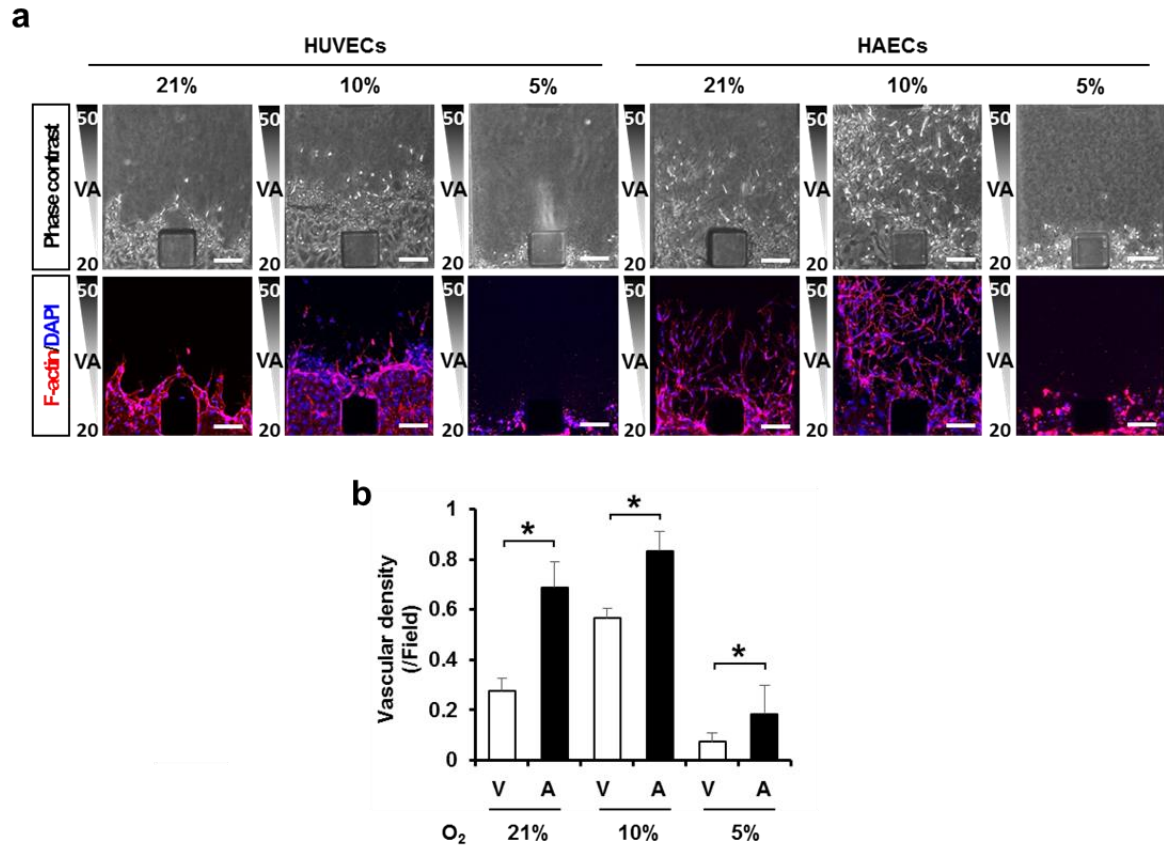

**Supplementary Figure 4.** Effect of hypoxic condition between HUVECs and HAECs in 3D microfluidic angiogenesis system. **(a)** Phase contrast image of HUVECs and HAECs in the 3D microfluidic angiogenesis system with different oxygen concentration (contained 21%, 10%, and 5% O<sub>2</sub>). Immunofluorescence staining using antibody followed by F-actin (red) and DAPI (blue). Scale bar = 150  $\mu$ m. **(b)** Quantification of the rate of vascular density per field in different oxygen concentration between HUVECs and HAECs. ‘V’ was indicated HUVECs and ‘A’ was indicated HAECs.  $n = 6$ . \* $p < 0.05$  versus HUVECs group.

## Supplementary Figure 5

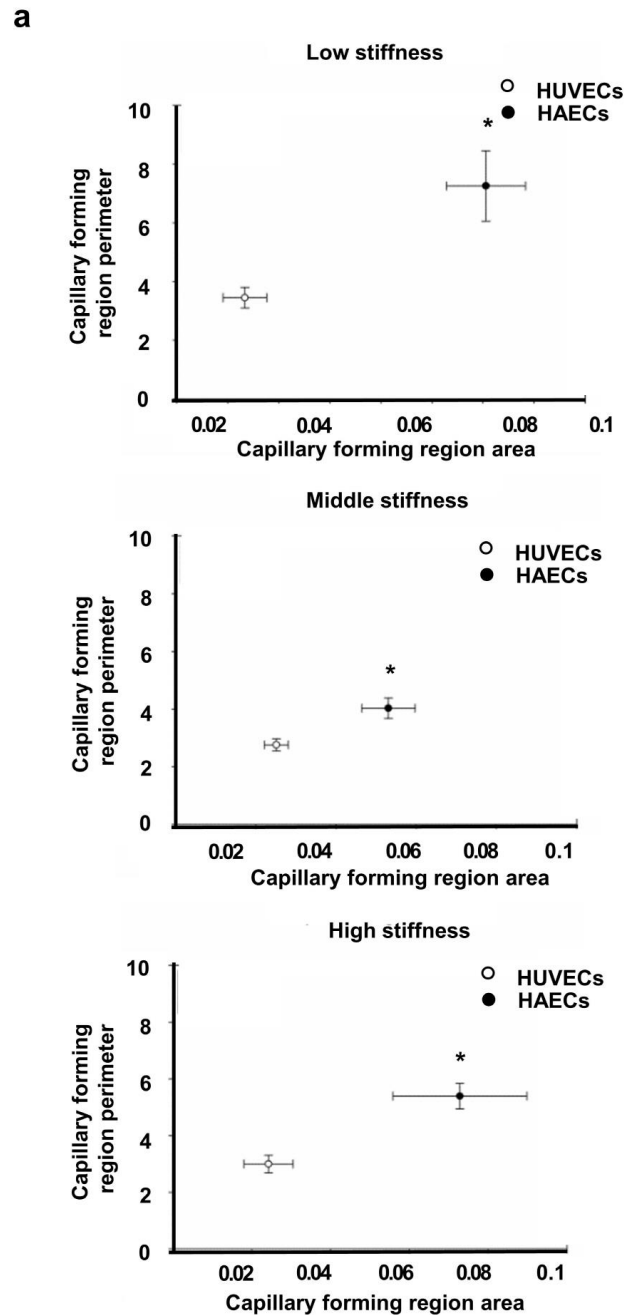

**Supplementary Figure 5.** Differences in sprouting pattern and other parameters between HUVECs and HAECs according to collagen gel stiffness. **(a)** Comparison of the perimeter and area of the capillary-forming region in HUVECs and HAECs.  $n = 4$ . \* $p < 0.05$  versus HUVECs group.

## Supplementary Figure 6

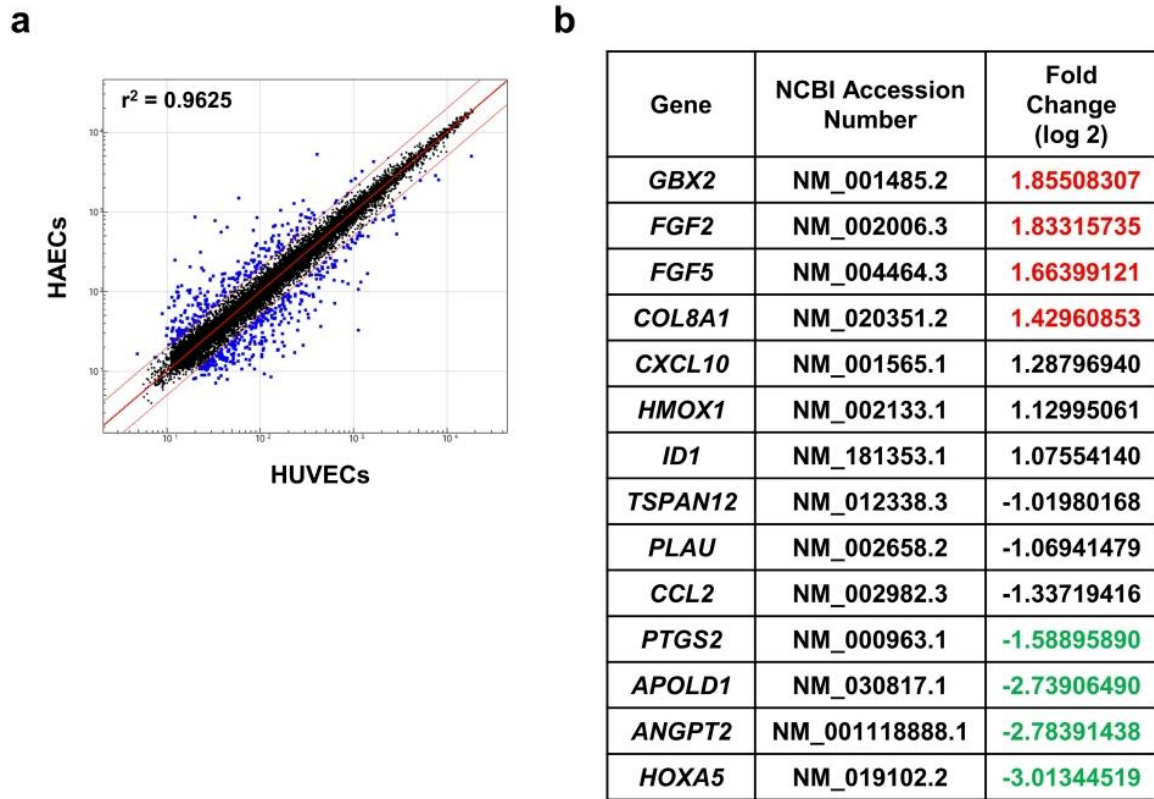

**Supplementary Figure 6.** mRNA expression scatter plot between HUVECs and HAECs. **(a)** mRNA expression correlation between HUVECs and HAECs. **(b)** List of typical angiogenesis-related factors sorted according to the “GO-term” document profile.

## Supplementary Figure 7

**a**

|         |      |               |                |        |            |                |        |         |
|---------|------|---------------|----------------|--------|------------|----------------|--------|---------|
| Array 1 | POS  | POS           | NEG            | NEG    | Angiogenin | EGF            | ENA-78 | FGF2    |
|         | POS  | POS           | NEG            | NEG    | Angiogenin | EGF            | ENA-78 | FGF2    |
|         | GRO  | IFN- $\gamma$ | IGF-1          | IL-6   | IL-8       | LEPTIN         | MCP-1  | PDGF-BB |
|         | GRO  | IFN- $\gamma$ | IGF-1          | IL-6   | IL-8       | LEPTIN         | MCP-1  | PDGF-BB |
|         | PIGF | RANTES        | TGF- $\beta$ 1 | TIMP-1 | TIMP-2     | Thrombopoietin | VEGF   | VEGF-D  |
|         | PIGF | RANTES        | TGF- $\beta$ 1 | TIMP-1 | TIMP-2     | Thrombopoietin | VEGF   | VEGF-D  |
|         |      |               |                |        |            |                | NEG    | POS     |
|         |      |               |                |        |            |                | NEG    | POS     |

  

|         |       |        |        |       |                |                |             |               |
|---------|-------|--------|--------|-------|----------------|----------------|-------------|---------------|
| Array 2 | POS   | POS    | NEG    | NEG   | Angiopoietin-1 | Angiopoietin-2 | Angiostatin | Endostatin    |
|         | POS   | POS    | NEG    | NEG   | Angiopoietin-1 | Angiopoietin-2 | Angiostatin | Endostatin    |
|         | G-CSF | GM-CSF | I-309  | IL-10 | IL-1 $\alpha$  | IL-1 $\beta$   | IL-2        | IL-4          |
|         | G-CSF | GM-CSF | I-309  | IL-10 | IL-1 $\alpha$  | IL-1 $\beta$   | IL-2        | IL-4          |
|         | I-TAC | MCP-3  | MCP-4  | MMP-1 | MMP-9          | PECAM-1        | Tie-2       | TNF- $\alpha$ |
|         | I-TAC | MCP-3  | MCP-4  | MMP-1 | MMP-9          | PECAM-1        | Tie-2       | TNF- $\alpha$ |
|         | uPAR  | VEGFR2 | VEGFR3 |       |                |                |             | POS           |
|         | uPAR  | VEGFR2 | VEGFR3 |       |                |                |             | POS           |

**b**

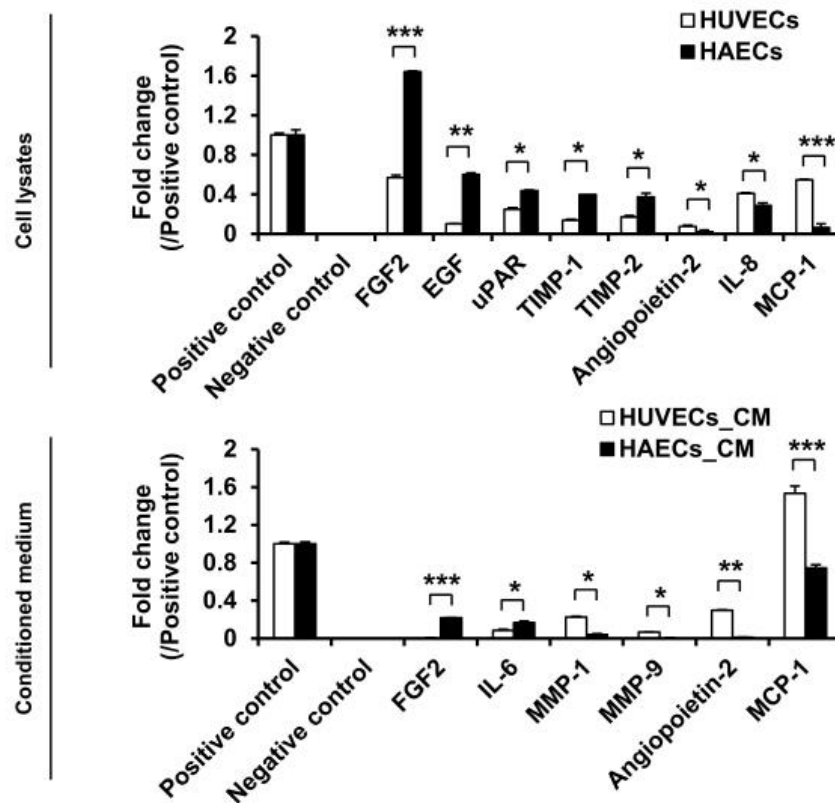

**Supplementary Figure 7.** Quantification of various protein levels between HUVEC or HAEC lysates and conditioned media. **(a)** Template showing the location of cytokines and growth factors on an angiogenesis cytokine array membrane. **(b)** Quantification of relative protein production levels in HUVECs and HAECs.  $n = 3$ . \*  $p < 0.05$ , \*\*  $p < 0.01$  and \*\*\*  $p < 0.001$  versus HUVECs or the HUVECs\_CM group.

## Supplementary Figure 8

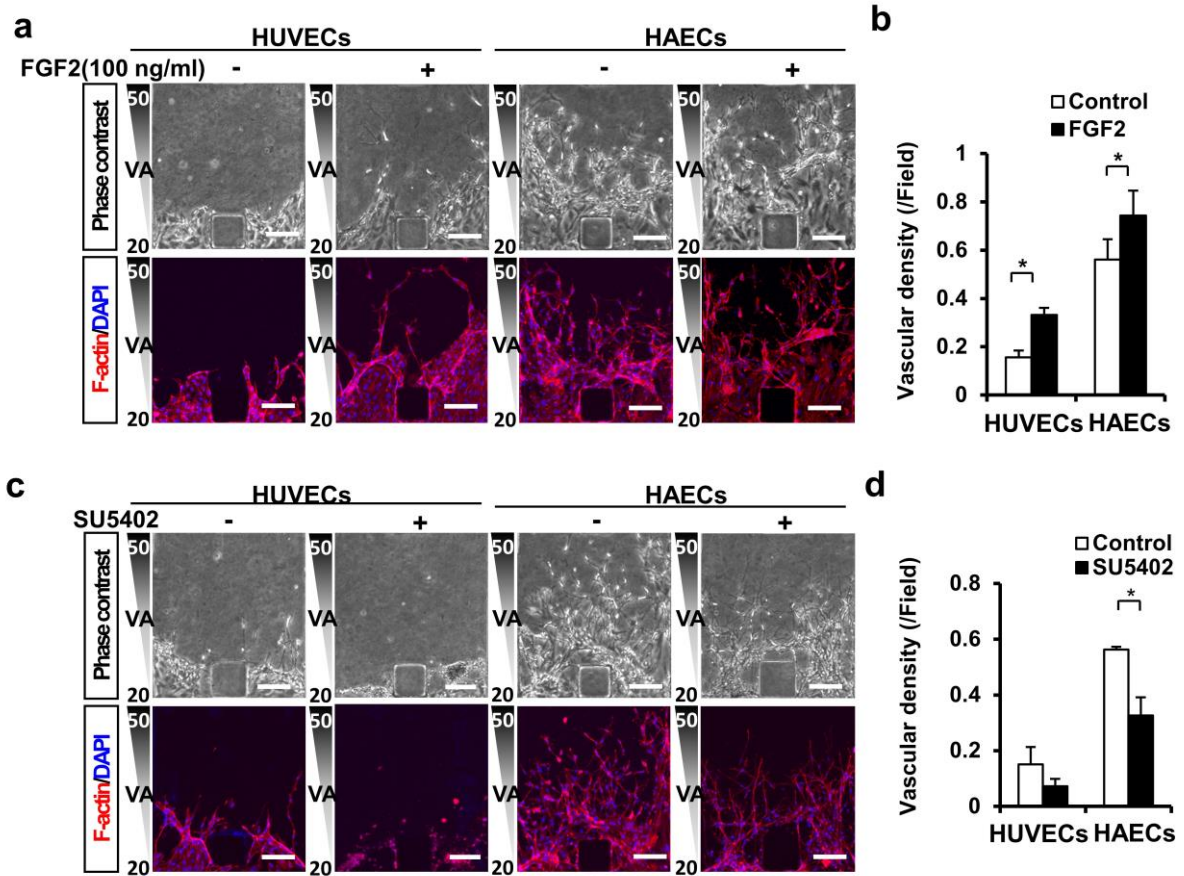

**Supplementary Figure 8.** FGF2 is a crucial factor for angiogenesis via VEGF-A stimulation. **(a)** Phase contrast image of HUVECs and HAECs in the 3D microfluidic angiogenesis system with the addition of FGF2 (100 ng/ml). Immunofluorescence staining using antibody followed by F-actin (red) and DAPI (blue) staining. Scale bar = 150  $\mu$ m. **(b)** Quantification the rate of vascular density per field between HUVECs and HAECs.  $n = 6$ . **(c)** Phase contrast image of HUVECs and HAECs in the 3D microfluidic angiogenesis system with addition of the FGFR inhibitor SU5402 (10 nM). Immunofluorescence staining using antibody followed by F-actin (red) and DAPI (blue) staining. Scale bar = 150  $\mu$ m. **(d)** Quantification the rate of vascular density per field between HUVECs and HAECs with the addition of SU5402.  $n = 6$ . \* $p < 0.05$  versus Control group.

## Supplementary Figure 9

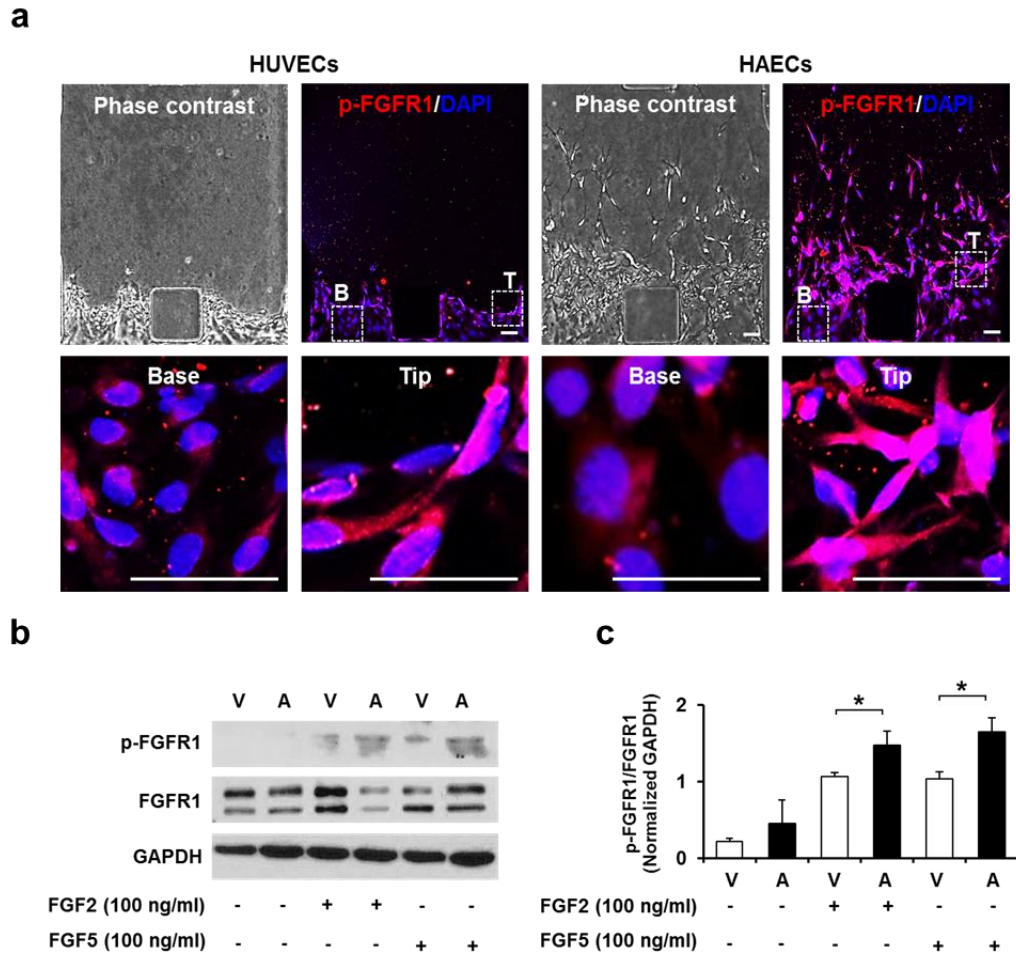

**Supplementary Figure 9.** HAECs have more FGFR1 sensitivity than HUVECs. **(a)** Phase contrast and immunofluorescence image of HUVECs and HAECs in the 3D microfluidic angiogenesis system. Immunofluorescence staining using antibody followed by p-FGFR1 (red) and DAPI (blue). Scale bar = 50  $\mu$ m. 'B' indicates base part and 'T' indicates tip part of sprouted vessel. **(b)** HUVECs and HAECs were stimulated for 30 min with basal medium (lane 1 and 2), basal medium containing 100 ng/ml FGF2 (lane 3 and 4) or FGF5 (lane 5 and 6). Total FGFR1 and GAPDH were evaluated as a loading control. 'V' indicates HUVECs and 'A' indicates HAECs. **(c)** Activation of FGFR1 was evaluated by quantification of western blot intensity and blotting for p-FGFR1.  $n = 3$ . \* $p < 0.05$  versus HUVECs group.

**Supplementary Table 1.** List of primers and product sizes

| Gene name      | Forward sequence (5'-3')    | Reverse sequence (5'-3')   | Product (bp) |
|----------------|-----------------------------|----------------------------|--------------|
| <b>GAPDH</b>   | ACCACCATGGAGAAGGC           | GGCATGGACTGTGGTCATGA       | 119          |
| <b>FGF1</b>    | TGAGAAGAAGACACCAAGTGGA      | TTGTGGCGCTTTCAAGACTA       | 110          |
| <b>FGF2</b>    | AGCGGCTGTACTGCAAAAAC        | GCTTGAAGTTGTAGCTTGATGTG    | 109          |
| <b>FGF3</b>    | CTACTGCGCCACGAAGTACC        | TCCACTGCCGTTATCTCCA        | 102          |
| <b>FGF4</b>    | CGGCTCTACTGCAACGTG          | GCCGAAGATGCTCACCAC         | 138          |
| <b>FGF5</b>    | ACTGGCCAATTTTGAATAAGAT      | CTGAGACTTTCAAATAGGGCAGA    | 96           |
| <b>FGF6</b>    | GGACCCACGAGGAGAACC          | TCACTCCAAAGAGACTCACCAC     | 78           |
| <b>FGFR1</b>   | CCACCTACTTCTCCGTC AATG      | GGGTTTGGTTTGGTGTTATCTG     | 112          |
| <b>FGFR2</b>   | TCTGCGTTTGAGTTGCTC          | GCTGCTGCTGCAGTCACTT        | 124          |
| <b>FGFR3</b>   | TGGGTTTTCTCATCACTCTGC       | CCACCAGGATGAACAGGAAG       | 134          |
| <b>FGFR4</b>   | ATTCCATCGGCCTCTCCTAC        | TAGCAAAGTGGGAGACTTGGT      | 121          |
| <b>VEGFR2</b>  | ATGACATTTTGATCATGGAGC       | CCCAGATGCCGTGCATGAG        | 193          |
| <b>CXCR4</b>   | CCTGCCTGGTATTGTATCC         | AGGATGACTGTGGTCTTGAGG      | 105          |
| <b>GBX2</b>    | AAAGAGGGCTCGCTGCTC          | ATCGCTCTCCAGCGAGAA         | 144          |
| <b>COL8A1</b>  | CATCTCAAGAACAAAAGACA AACTGA | TTGCTGGTGCCTTCCTGT         | 107          |
| <b>CXCL10</b>  | GAAAGCAGTTAGCAAGGAAAGGT     | GACATATACTCCATGTAGGGAAGTGA | 132          |
| <b>HMOX1</b>   | TGAACTCCCTGGAGATGACTC       | AGCTCCTGCAACTCCTCAAA       | 103          |
| <b>ID1</b>     | GAATCATGAAAGTCGCCAGTG       | ACAGACAGCGCACCACCT         | 111          |
| <b>TSPAN12</b> | CAATGGCCAGAGAAGATTCC        | CTGCCAACACACTGATGAC        | 93           |
| <b>PLAU</b>    | TTGCTCACCACAACGACATT        | GGCAGGCAGATGGTCTGTAT       | 94           |
| <b>CCL2</b>    | AGTCTCTGCCGCCCTTCT          | GTGACTGGGGCATTGATTG        | 93           |
| <b>PTGS2</b>   | CTTCACGCATCAGTTTTTCAAG      | TCACCGTAAATATGATTTAAGTCCAC | 96           |
| <b>APOLD1</b>  | CCAGGGGTACTCGGAAGG          | AGCAGCAGTCCCTGGAAG         | 136          |
| <b>ANGPT2</b>  | TGCCACGGTGAATAATTCAG        | TTCTTCTTTAGCAACAGTGGG      | 123          |
| <b>HOXA5</b>   | GCGCAAGCTGCACATAAG          | CGGTTGAAGTGGAATCCTT        | 114          |
